# Supplementary material for: Continuous polyacrylonitrile nanofiber yarns: preparation and dry-drawing treatment for carbon nanofiber production
Source: Royal Society of Chemistry journal article supplement (doi:10.1039/c4ra16247a), 2015-01-01
Supplement: c4ra16247a1.pdf [file c4ra16247a1.pdf]

# Continuous Polyacrylonitrile Nanofiber Yarns: Preparation and Dry-drawing Treatment for Carbon Nanofiber Production

Armstrong Xie, Haitao Niu, Tong Lin\*

Institute for Frontier Materials, Deakin University, Geelong, VIC3216, Australia

*E-mail:* [tong.lin@deakin.edu.au](mailto:tong.lin@deakin.edu.au)

## Electronic Supplementary Information

---

\* Corresponding author, Fax: +61 3 52271245; email: [tong.lin@deakin.edu.au](mailto:tong.lin@deakin.edu.au)

**S1: The relationship between strain at break and tensile strength of carbon fibers.**

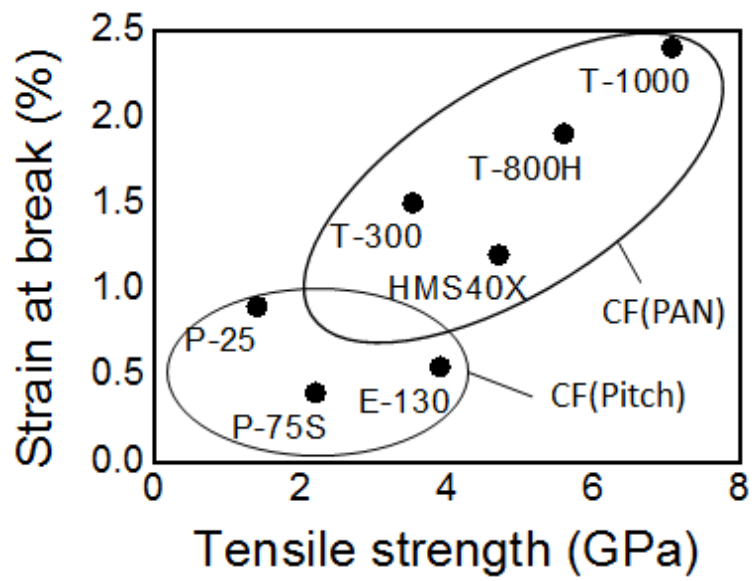

**Fig. S1** Strain at break vs tensile strength of pitch and PAN derived carbon fibers [Figure was prepared based on the data in the book, D. D. L. Chung, Carbon Fiber Composites, Butterworth-Heinemann, 1994].

**S2: DSC results of PAN power and nanofiber yarns.**

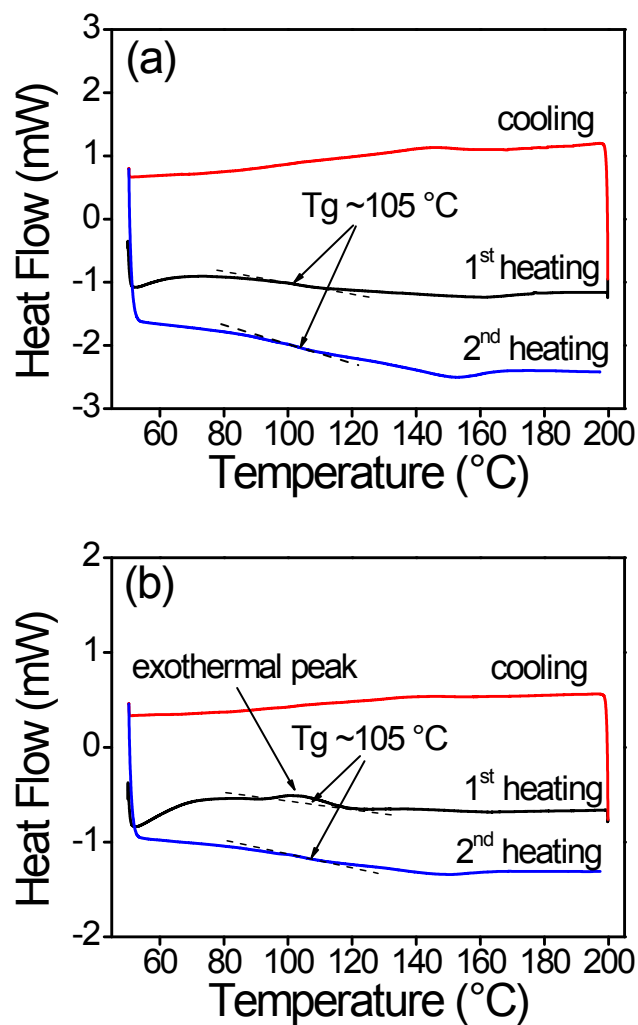

**Fig. S2** DSC curves of a) PAN polymer powder, and b) electrospun PAN nanofiber yarn. (1<sup>st</sup> heating rate 5 °C/min, 1<sup>st</sup> cooling rate 5 °C/min, 2<sup>nd</sup> heating rate 10 °C/min).
